# Supplementary material for: Identification of Key Residues for pH Dependent Activation of Violaxanthin De-Epoxidase from Arabidopsis thaliana
Source: PLoS One. 2012 Apr 27;7(4):e35669. doi: 10.1371/journal.pone.0035669 (PMC3338714; doi:10.1371/journal.pone.0035669)
Supplement: Table S1 — pKa values calculated for inactive VDE monomer at pH 7 (3CQN.pdb). Three independent runs were performed and here average and standard deviation values are reported. Between brackets is shown the sign of the eventual charged state. Residues showing pKa between 5 and 7 (± 0.5) are highlighted. Residues numbers are taken from deposited structure and correspond to the Arabidopsis mature protein. (XLS) [file pone.0035669.s007.xls]

## Sheet: T1
Residue	pKa	St Dev	Residue	pKa	St Dev	Residue	pKa	St Dev
N term (+) 081	8.2	0.07	LYS (+) 154	13.34	0.88	TYR (-) 197	18.23	0.17
GLU (-) 081	4.15	0.58	ASP (-) 158	3.14	0.2	TYR (-) 198	19.15	0.01
ASP (-) 086	4.98	0.02	TYR (-) 166	14.83	0.21	ARG (+) 199	12.7	0.17
ASP (-) 098	5.3	0.16	HIS (+) 168	7.01	0.33	ARG (+) 201	12.7	0.12
LYS (+) 102	11.74	0.2	ASP (-) 169	4.81	0.26	ASP (-) 203	3.96	0.04
TYR (-) 104	11.96	0.14	GLU (-) 171	3.69	0.37	ASP (-) 206	5.19	0.1
ASP (-) 114	1.18	0.04	TYR (-) 172	9.66	0.02	TYR (-) 208	13.42	0.24
ASP (-) 117	5.26	0.35	HIS (+) 174	7.42	0.03	TYR (-) 214	19.15	0
HIS (+) 121	4.21	0.3	TYR (-) 175	13.46	0.29	ARG (+) 216	14.65	0.03
GLU (-) 122	3.58	0.18	ASP (-) 177	7.93	0.43	GLU (-) 227	4.09	0.18
HIS (+) 124	7.36	0.2	ASP (-) 178	3.35	0.66	GLU (-) 229	4.75	0.25
GLU (-) 126	4.41	0.08	TYR (-) 180	17.01	0.11	LYS (+) 230	11.56	0.11
ASP (-) 128	4.48	0.01	LYS (+) 185	12.03	0.63	LYS (+) 233	11.54	0.17
LYS (+) 130	11.41	0.33	GLU (-) 187	4.39	0.32	ARG (+) 237	14.49	0.36
ARG (+) 138	13.23	0.39	LYS (+) 189	11.78	0.11	ASP (-) 238	3.73	0.21
LYS (+) 140	11.98	0.38	GLU (-) 191	4.3	0.36	ARG (+) 244	13.07	0.07
ASP (-) 143	3.69	0.05	ASP (-) 192	1.75	0.11	ASP (-) 246	3.94	0.11
ARG (+) 149	12.77	0.23	TYR (-) 193	15.96	0.11	C Term (-) 250	4.93	0.09
